# Supplementary material for: Synthesis of methanol from CO2hydrogenation promoted by dissociative adsorption of hydrogen on a Ga3Ni5(221) surface
Source: Royal Society of Chemistry journal article supplement (doi:10.1039/c7cp03231e), 2017-01-01
Supplement: c7cp03231e1.pdf [file c7cp03231e1.pdf]

## Supporting information

### **Methanol synthesis from CO<sub>2</sub> hydrogenation promoted by hydrogen dissociation on Ga<sub>3</sub>Ni<sub>5</sub>(221) surface**

Qingli Tang <sup>a,b</sup>, Zhemin Shen <sup>a,\*</sup>, Liang Huang <sup>b,c</sup>, Ting He <sup>d</sup>, Hertanto Adidharma <sup>b</sup>, Armistead G.

Russell <sup>e</sup>, Maohong Fan <sup>b,e,\*</sup>

<sup>a</sup> *School of Environmental Science and Engineering, Shanghai Jiao Tong University, Shanghai 200240, P.R. China.*

<sup>b</sup> *Departments of Chemical and Petroleum Engineering, University of Wyoming, Laramie 82071, WY, USA.*

<sup>c</sup> *The State Key Laboratory of Refractories and Metallurgy, Wuhan University of Science and Technology, Wuhan 430081, Hubei, P.R. China*

<sup>d</sup> *Idaho National Laboratory, Idaho Falls, ID 83415, USA*

<sup>e</sup> *School of Civil and Environmental Engineering, Georgia Institute of Technology, Atlanta 30332, GA, USA*

---

\* Corresponding author at: 800 Dongchuan Road, Minhang District, Shanghai 200240, China. E-mail: zmshe@sjtu.edu.cn  
1000 E University Ave., Laramie, WY 82071, USA. E-mail: mfan@uwyo.edu

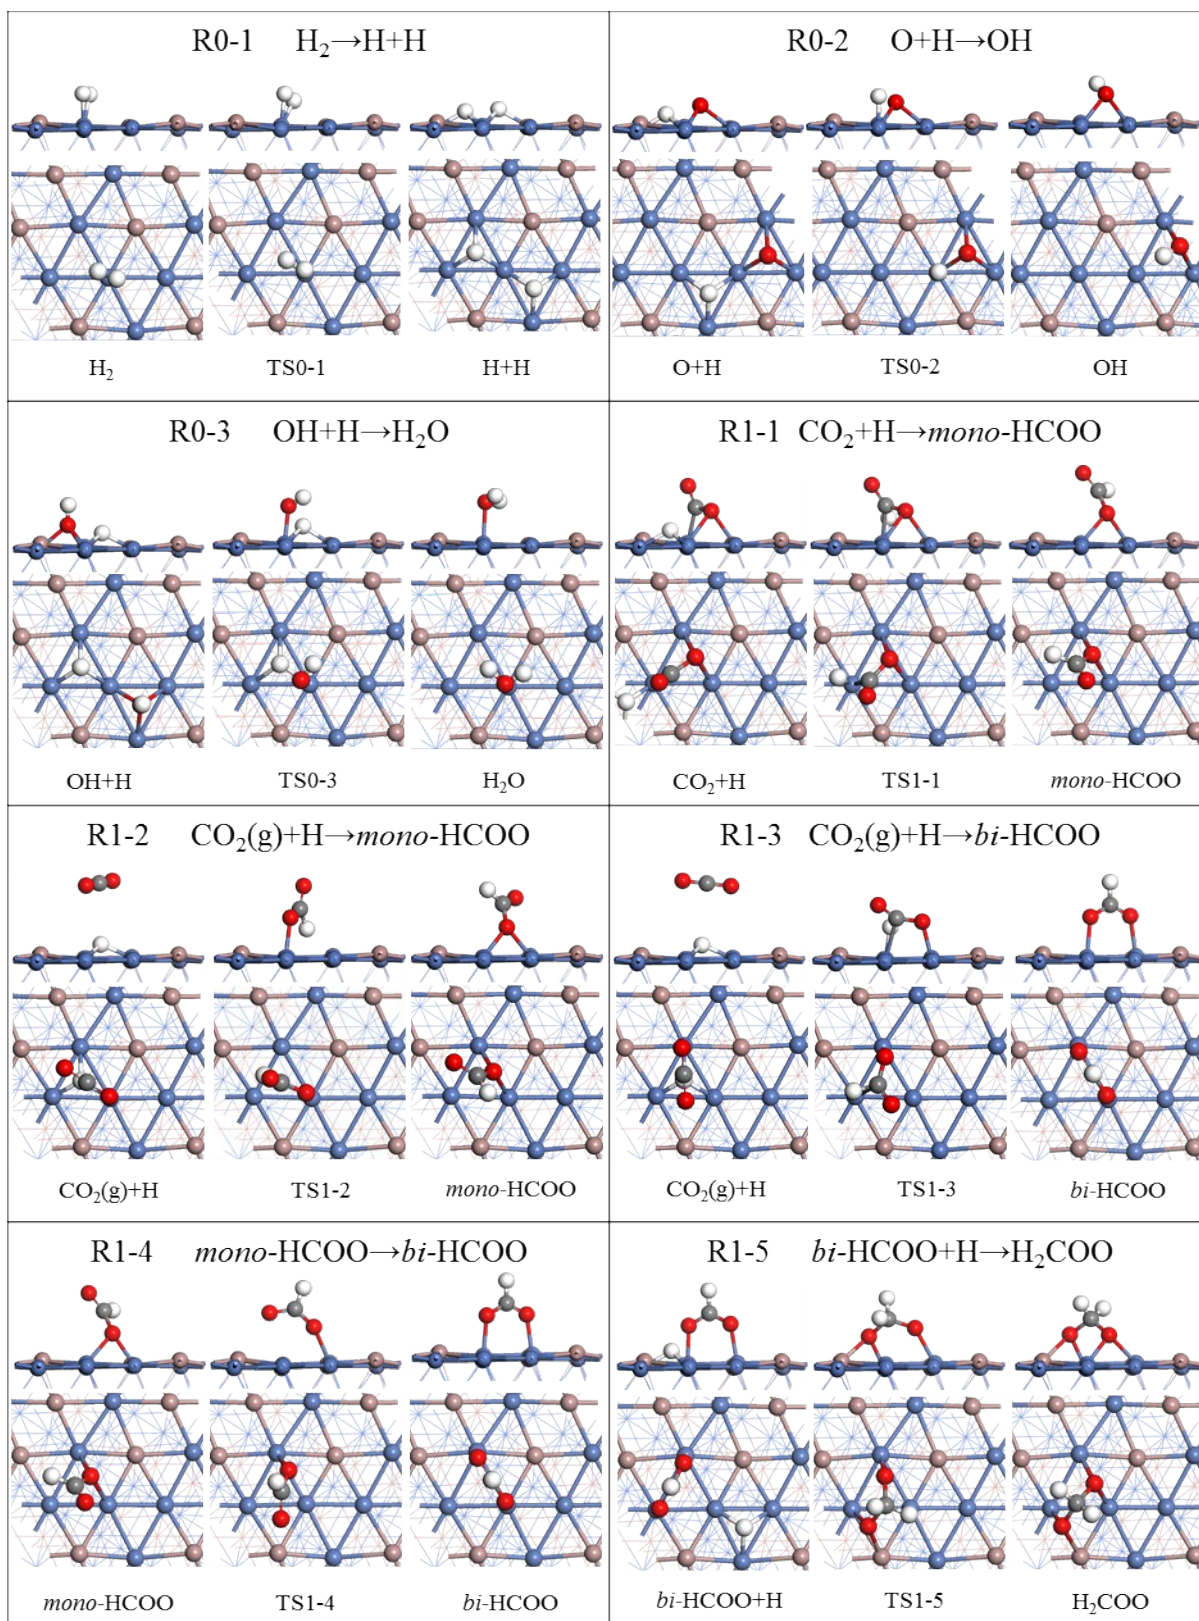

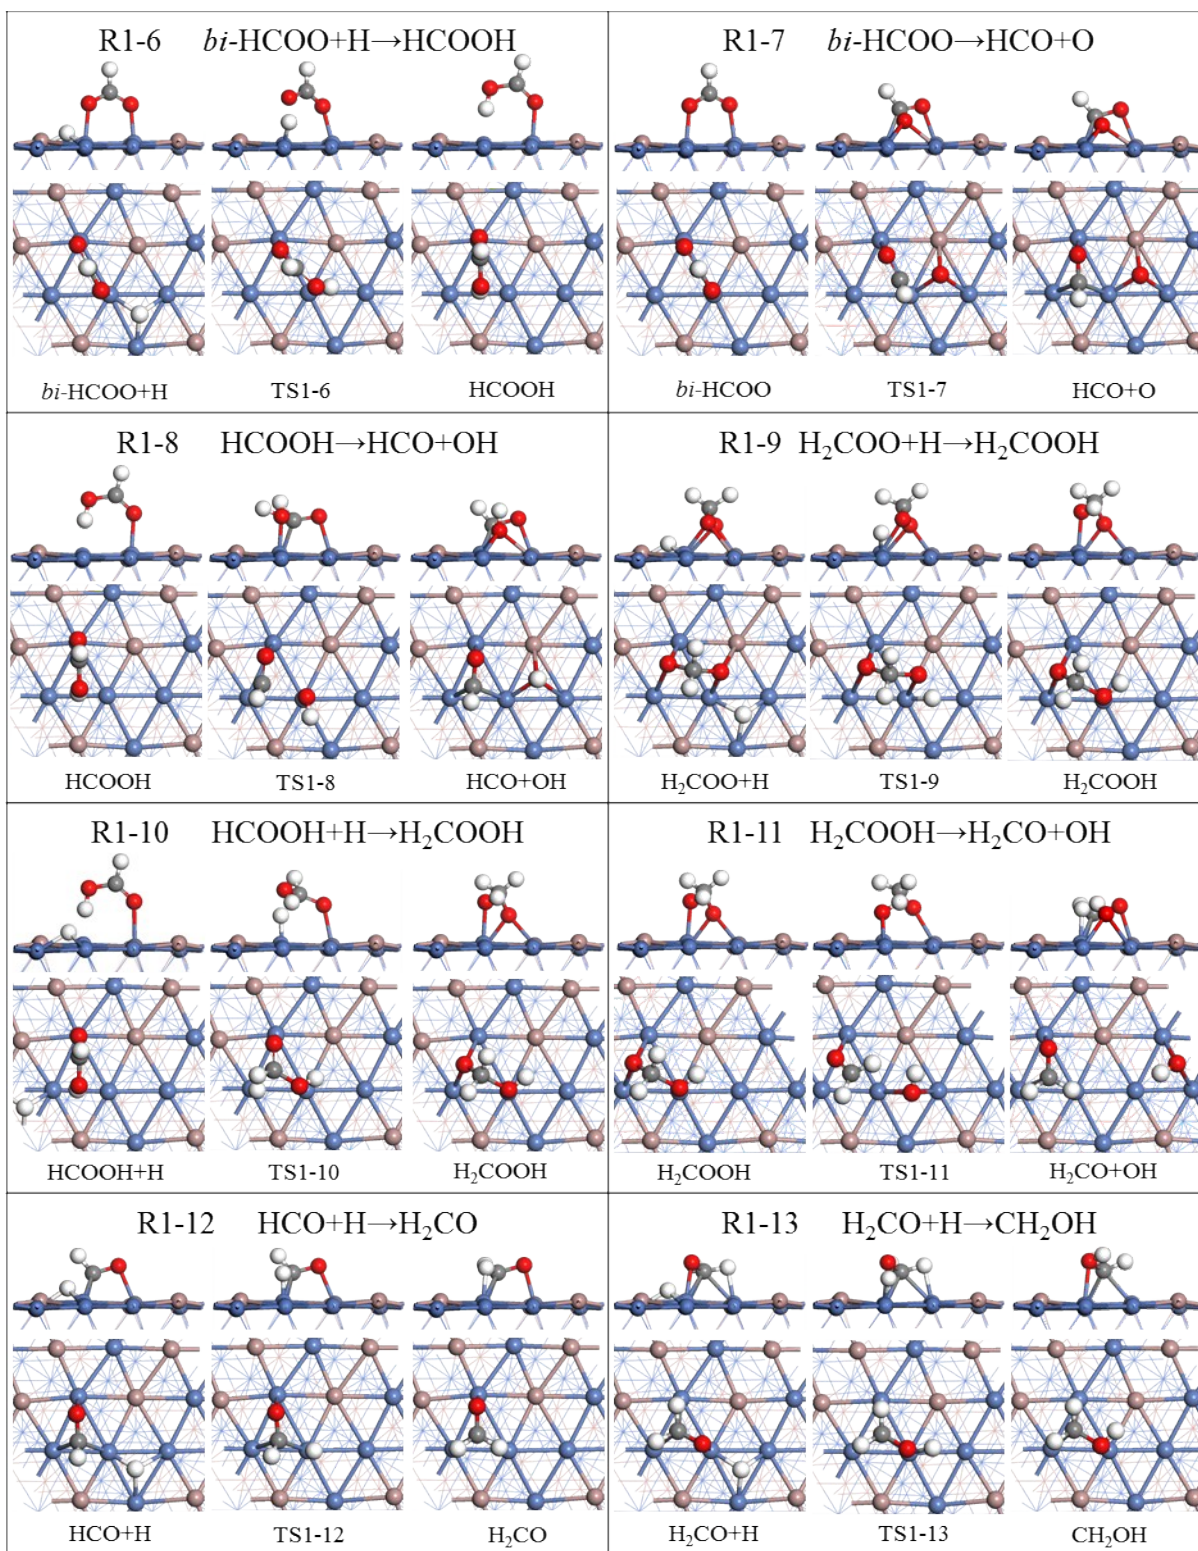



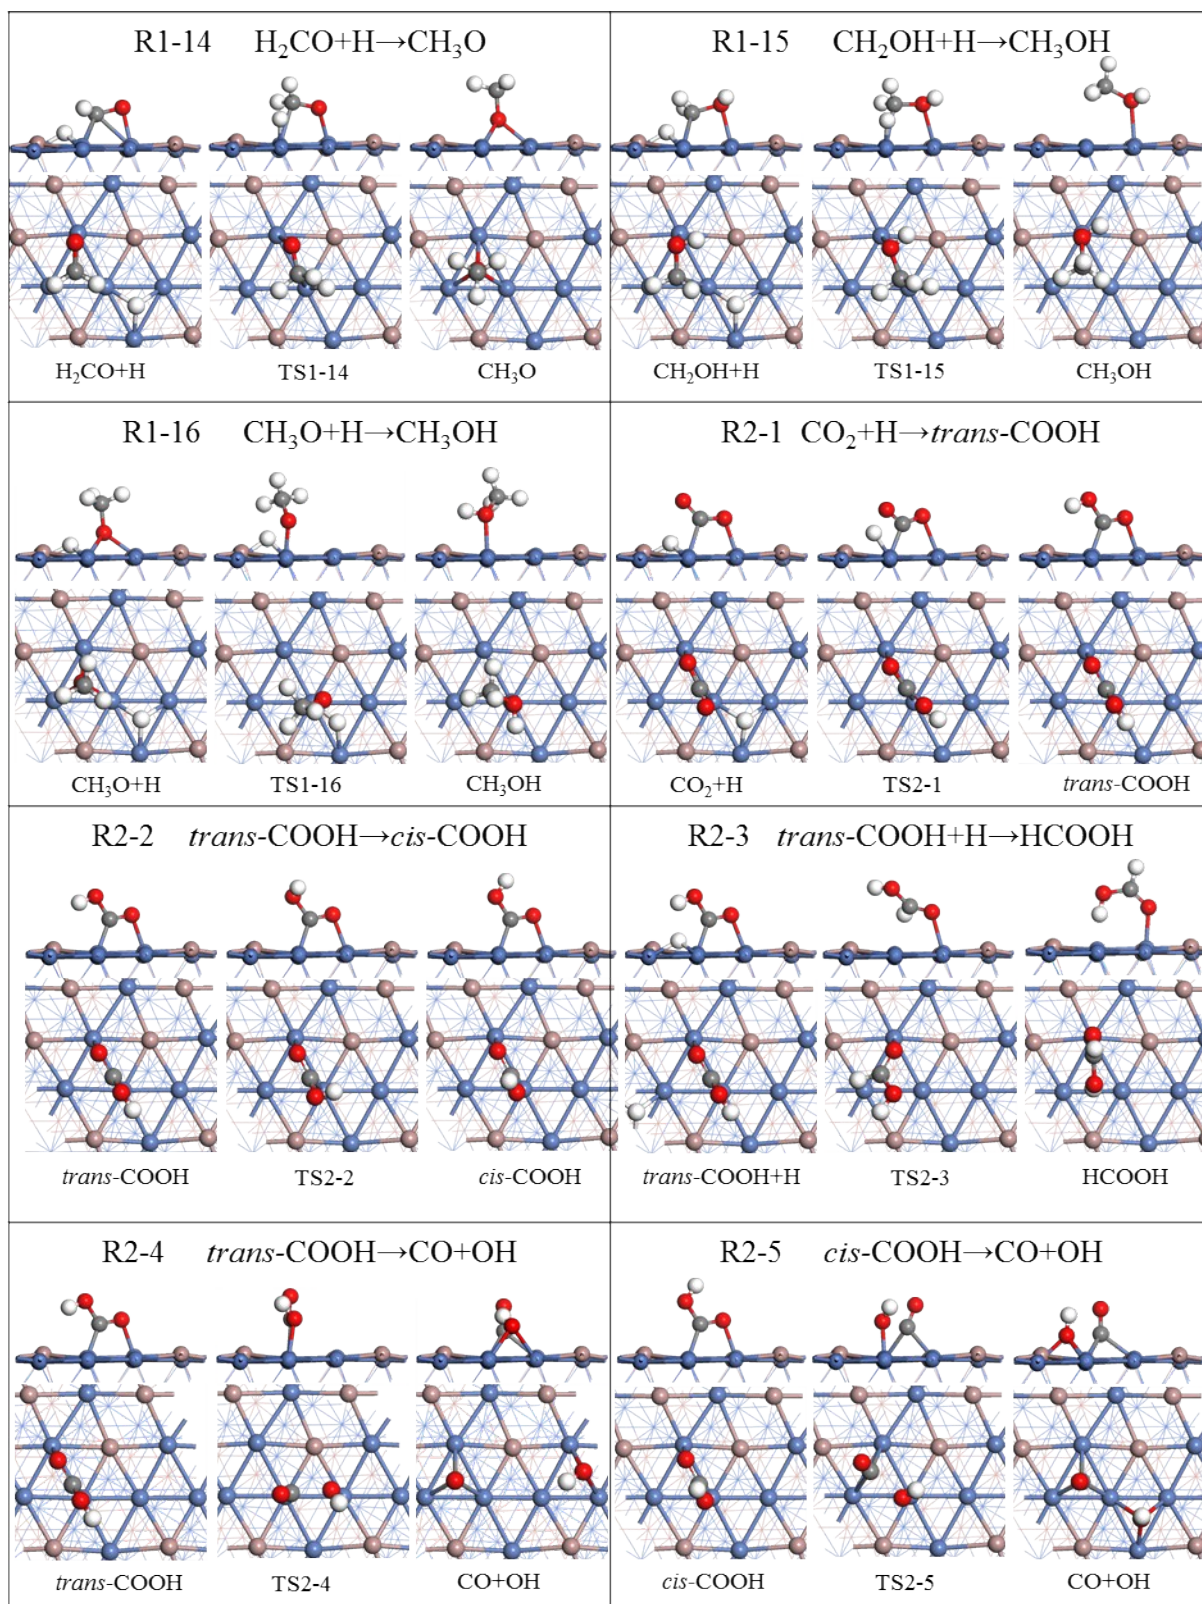

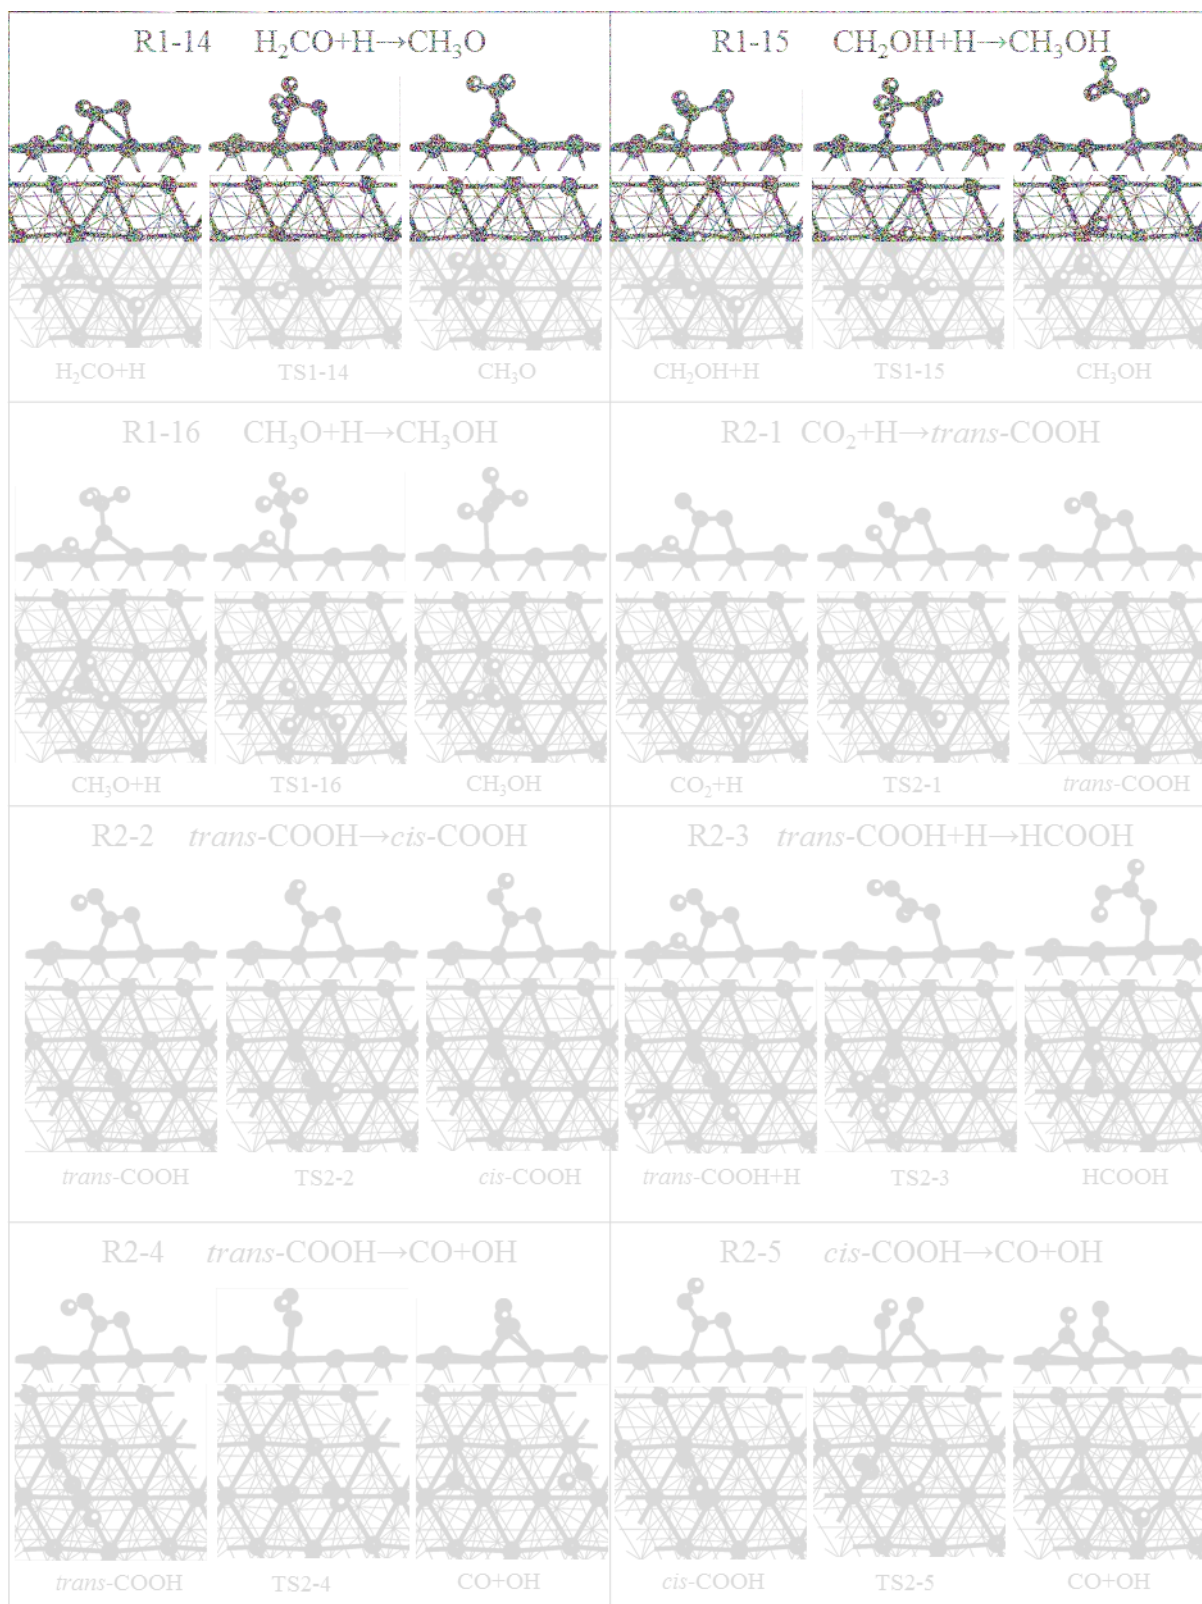



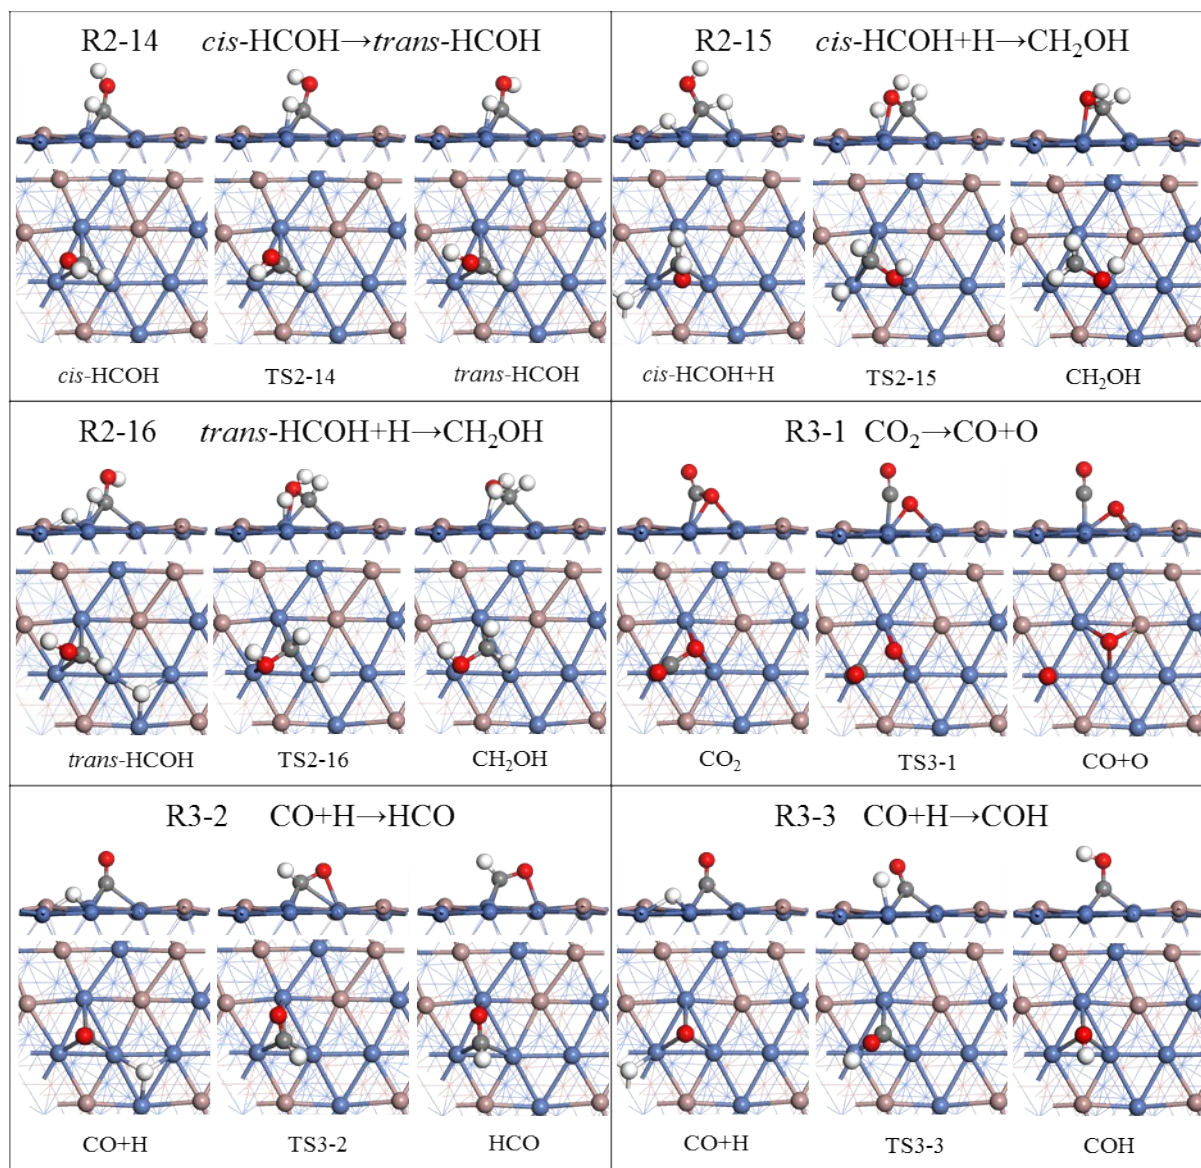

**Fig. S1** The side views (top one) and top views (bottom one) of initial states, transition states and final states of all the elementary steps that are considered in the process of CO<sub>2</sub> hydrogenation to CH<sub>3</sub>OH on Ga<sub>3</sub>Ni<sub>5</sub>(221) surface. Here, C, H, O, Ni and Ga atoms are shown in grey, white, red, blue and brown balls, respectively.
